# Supplementary material for: Improving the Flame Retardant Efficiency of Layer by Layer Coatings Containing Deoxyribonucleic Acid by Post-Diffusion of Hydrotalcite Nanoparticles
Source: MDPI journal article supplement (doi:10.3390/ma10070709), 2017-06-27
Supplement: s1 [file s1]

# Supplementary Materials: Improving the Flame Retardant Efficiency of Layer by Layer Coatings Containing Deoxyribonucleic Acid by Post-Diffusion of Hydrotalcite Sanoparticles

Federico Carosio <sup>1</sup>, Jenny Alongi <sup>2,\*</sup>, Chiara Paravidino <sup>1</sup> and Alberto Frache <sup>1</sup>

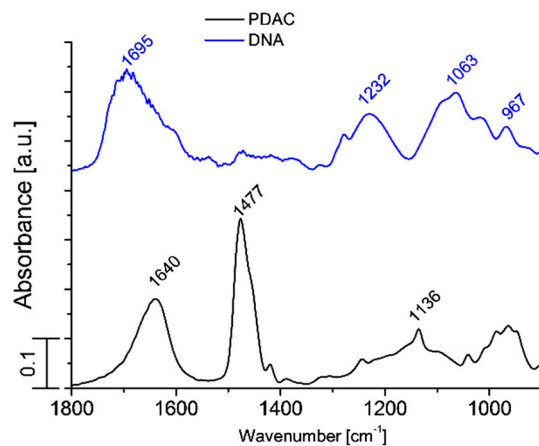

Figure S1. IR spectra of neat PDAC and DNA.

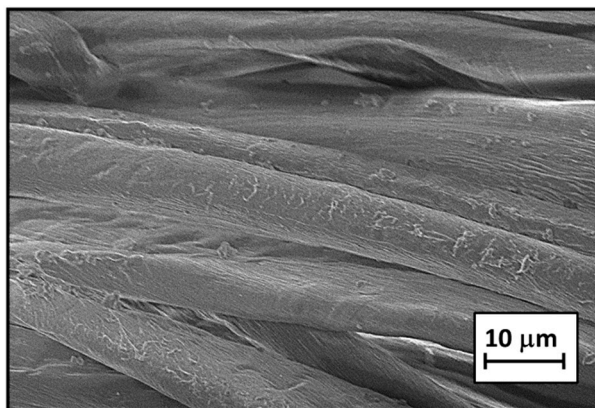

Figure S2. SEM micrograph of untreated cotton.

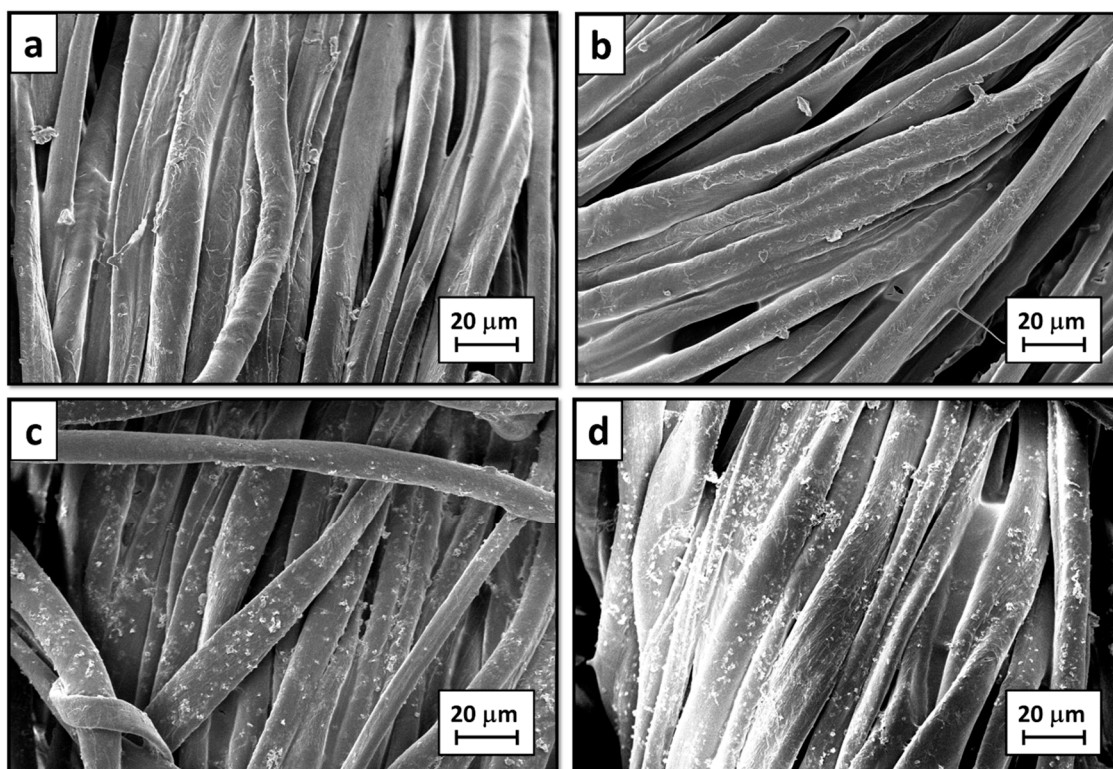

**Figure S3.** Low magnification SEM micrographs of (a) 5BL+0.1%\_HT; (b) 10BL+0.1%\_HT; (c) 5BL+1%\_HT and (d) 10BL+1%\_HT.

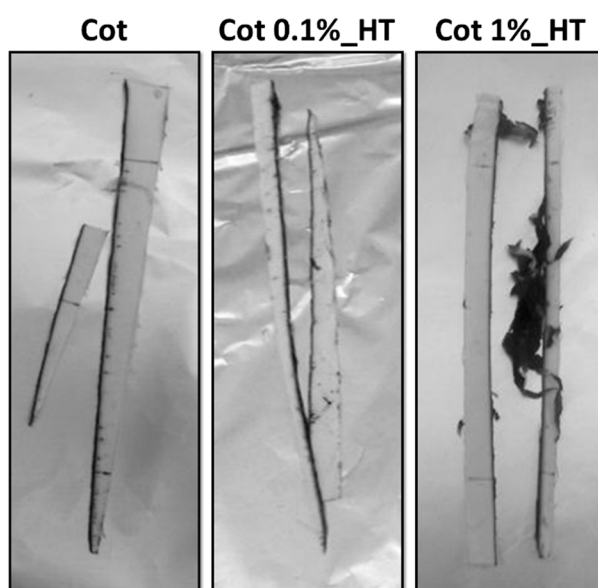

**Figure S4.** Post-combustion residues of neat cotton and cotton treated with simple adsorption of HT nanoparticles.

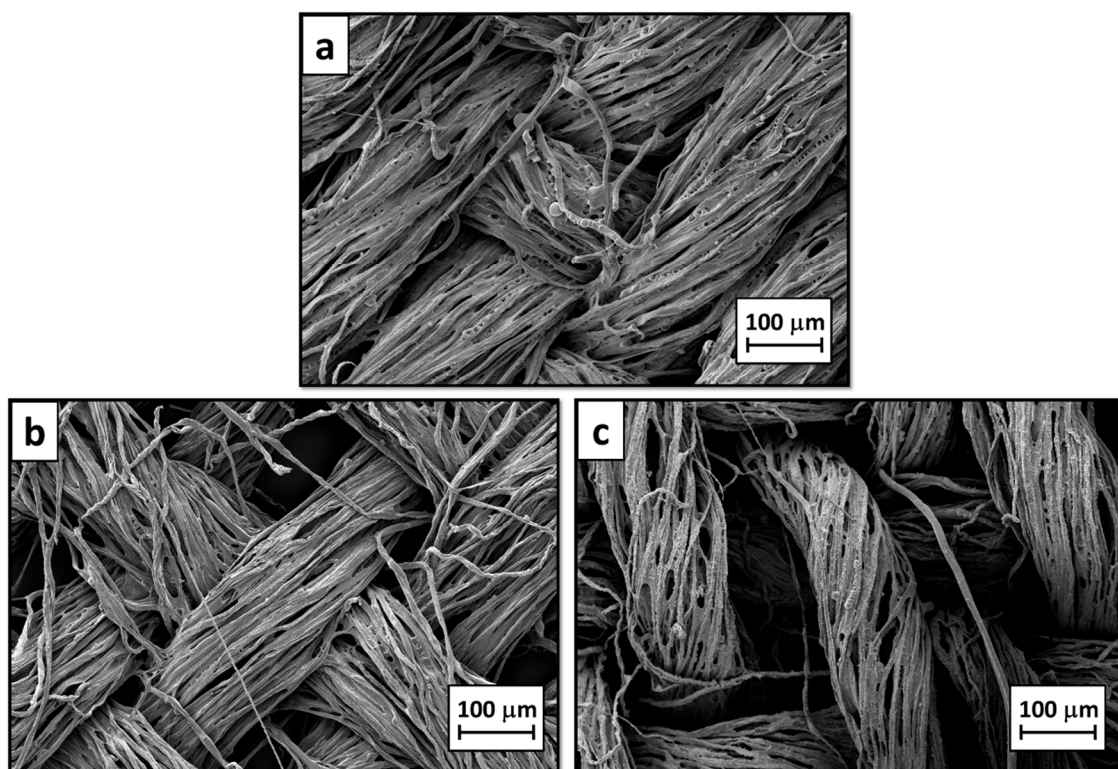

**Figure S5.** Low magnification SEM micrographs of post-combustion residues: (a) 10BL; (b) 10BL+0.1%\_HT and (c) 10BL+1%\_HT.
